# Supplementary material for: Direct capture of low-concentration CO 2 and selective hydrogenation to CH 4 over Al 2 O 3 -supported Ni–La dual functional materials
Source: Royal Society of Chemistry journal article supplement (doi:10.1039/d4gc03218g), 2024-01-01
Supplement: d4gc03218g1.pdf [file d4gc03218g1.pdf]

## Direct capture of low-concentration CO<sub>2</sub> and selective hydrogenation to CH<sub>4</sub> over Al<sub>2</sub>O<sub>3</sub>-supported Ni-La dual functional materials

Tomotaka Tatsumichi<sup>a</sup>, Rei Okuno<sup>a</sup>, Hideki Hashimoto<sup>a,b</sup>, Norikazu Namiki<sup>a</sup>, Zen Maeno<sup>a,\*</sup>

<sup>a</sup>School of Advanced Engineering, Kogakuin University, 2665-1, Nakano-machi, Hachioji, Tokyo, 192-0015, Japan

<sup>b</sup>Center for Basic Research on Materials, National Institute for Materials, Science, 1-2-1, Sengen, Tsukuba, Ibaraki 305-0047, Japan, PRESTO, Japan Science and Technology Agency (JST), Kawaguchi, Saitama, 332-0012, Japan

\*Corresponding author

Zen Maeno, E-mail: [zmaeno@cc.kogakuin.ac.jp](mailto:zmaeno@cc.kogakuin.ac.jp)

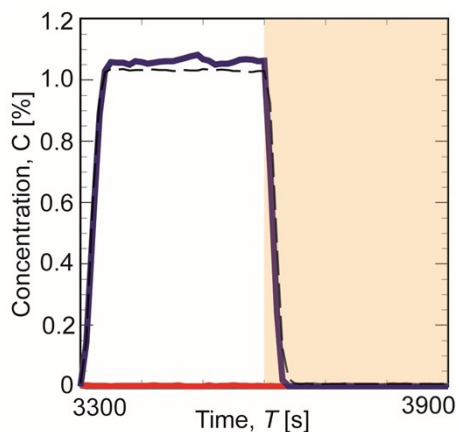

Figure S1. Comparison of CO<sub>2</sub> profiles in blank tests with SiC (blue solid line) and without any material (black dashed line).

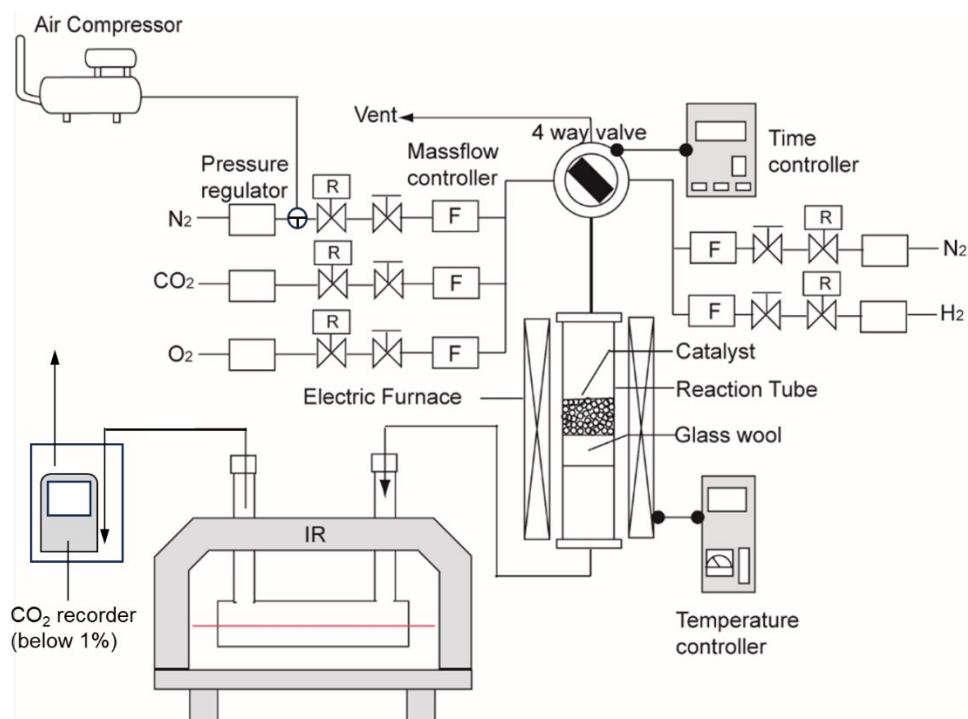

Figure S2 Schematic view of reactor setup of CCR including gas detector system.

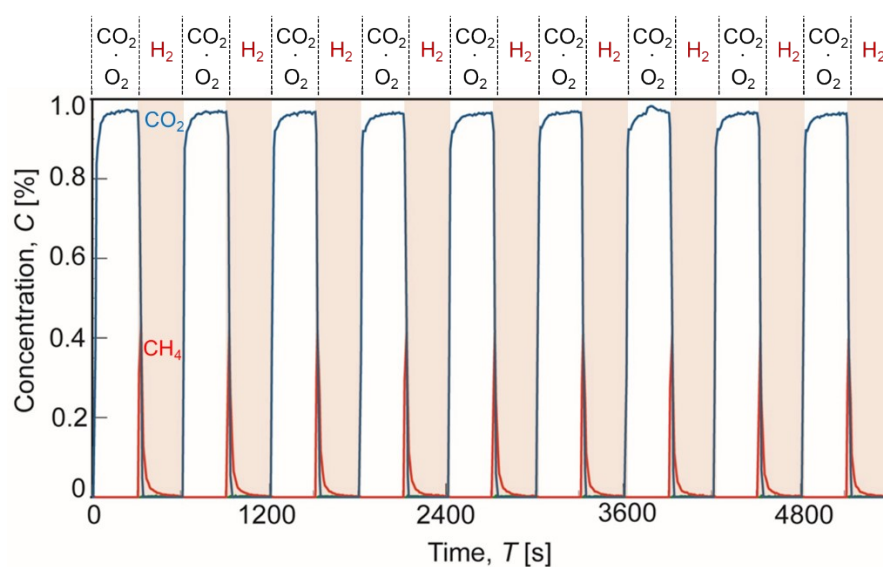

Figure S3 Concentration profile of  $\text{CO}_2$  and  $\text{CH}_4$  in  $\text{CO}_2$  capture in the presence of  $\text{O}_2$  and hydrogenation using  $\text{Ni-La}(15)/\text{Al}_2\text{O}_3$ .

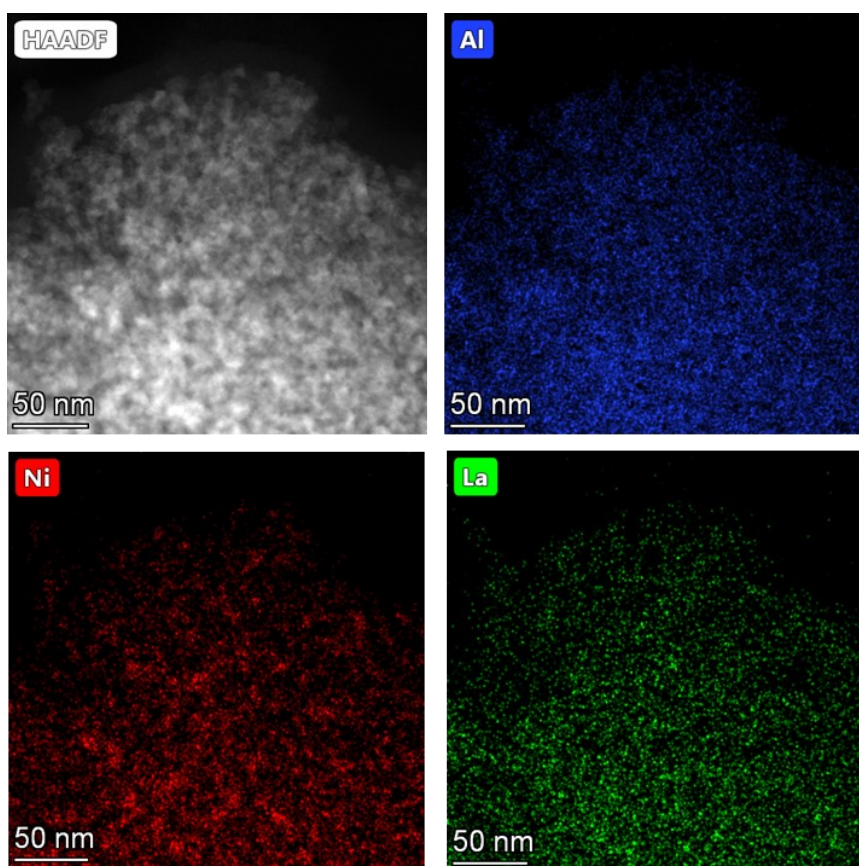

Figure S4 Different HAADF-STEM image and elemental mapping obtained by EDX spectroscopy for  $\text{Ni-La}(15)/\text{Al}_2\text{O}_3$

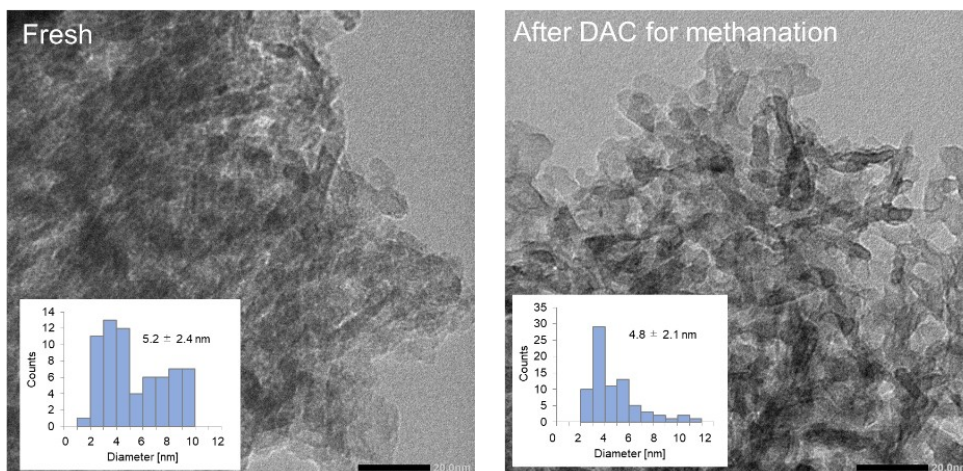

Figure S5 TEM images of fresh and spent Ni-La(15)/Al<sub>2</sub>O<sub>3</sub> (after 80 cycles of DAC and methanation)

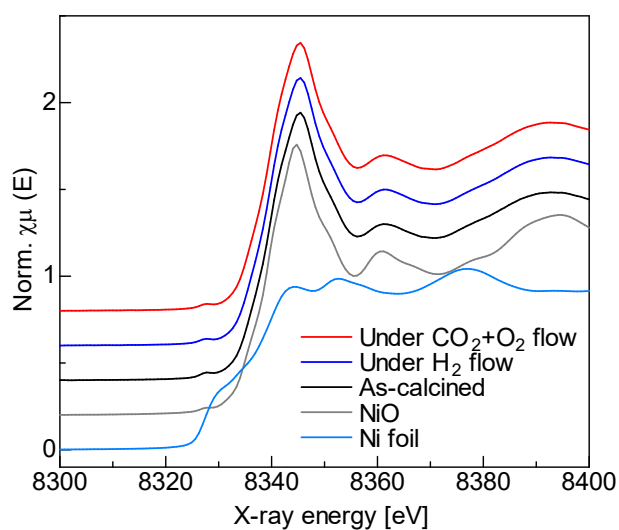

Figure S6 Ni K-edge XANES spectra of Ni-La(15)/Al<sub>2</sub>O<sub>3</sub> before CCR (as-calcined), after H<sub>2</sub> pretreatment (under H<sub>2</sub> flow), and during CO<sub>2</sub> capture from the mixture with O<sub>2</sub> (under CO<sub>2</sub>+O<sub>2</sub> flow). The spectra of Ni-La(15)/Al<sub>2</sub>O<sub>3</sub> were recorded at 350 C using an in situ quartz cell connecting to gas mixture systems (at BL14B2 in SPring-8) without exposure to air whereas two reference samples were measured at ambient temperature.

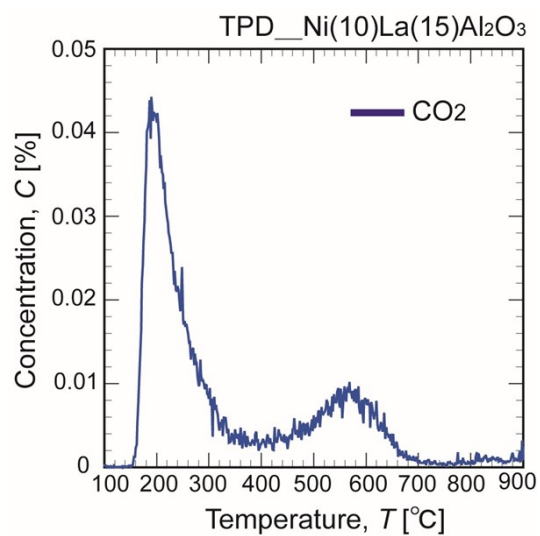

Figure S7 TPD profile of CO<sub>2</sub>-preadsorbed Ni-La(15)/Al<sub>2</sub>O<sub>3</sub>. The H<sub>2</sub> prereduced DFMs were exposed to 1% CO<sub>2</sub>+20% O<sub>2</sub>/N<sub>2</sub> flow at 100 °C, followed by N<sub>2</sub> purge for 15 min and successive TPD measurement under N<sub>2</sub> flow with increasing the temperature to 600 °C (10 °C /min).

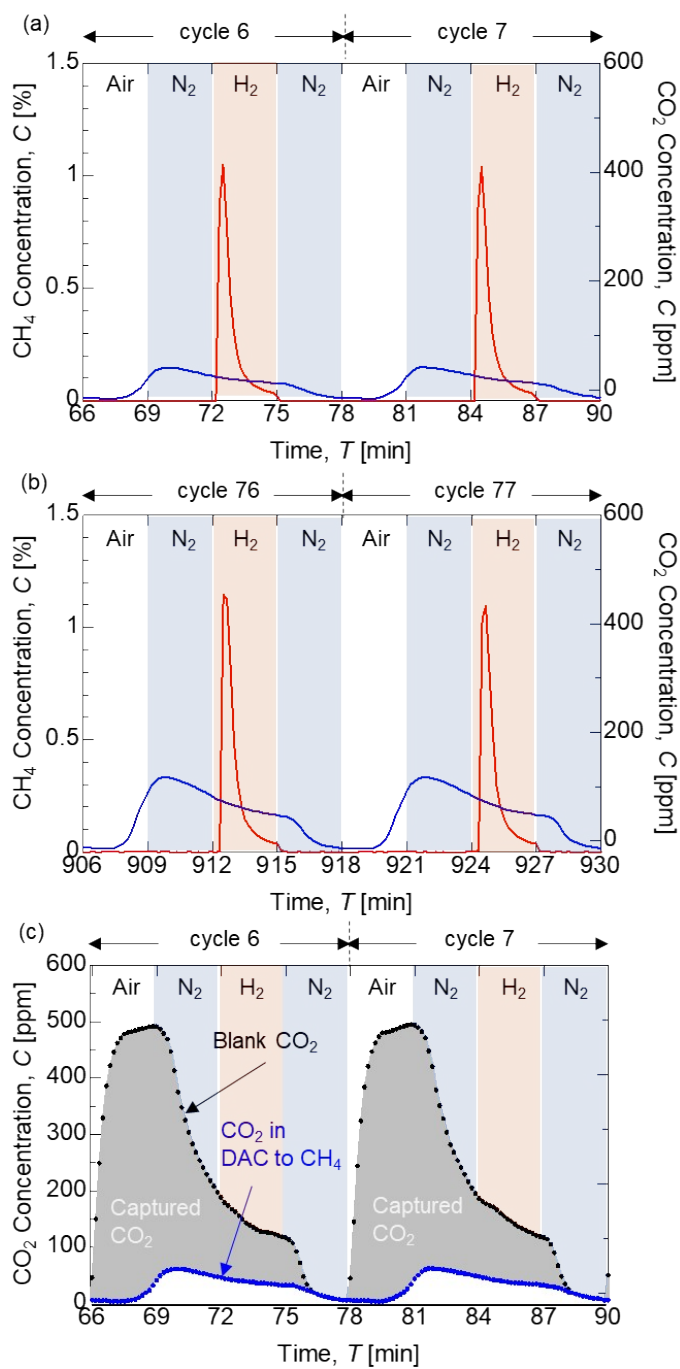

Figure S8 (a and b) Concentration profile of CO<sub>2</sub> (red) and CH<sub>4</sub> (blue) in ambient DAC and methanation using Ni-La(15)/Al<sub>2</sub>O<sub>3</sub> in different cycles. (c) Comparison of CO<sub>2</sub> concentration profile with blank test (black dot line).

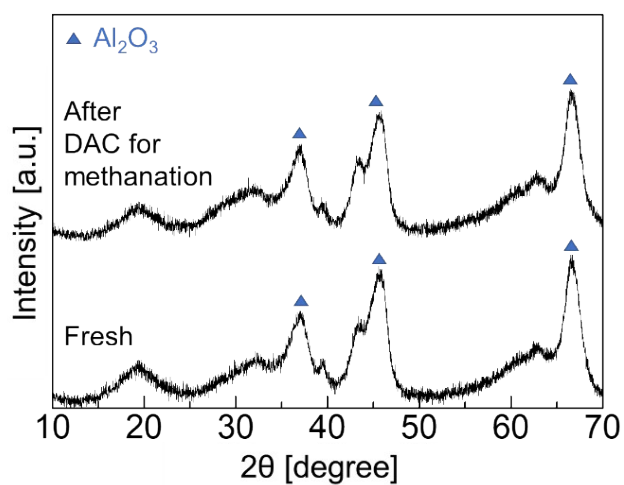

Figure S9 XRD patterns of fresh and spent Ni-La(15)/Al<sub>2</sub>O<sub>3</sub>.

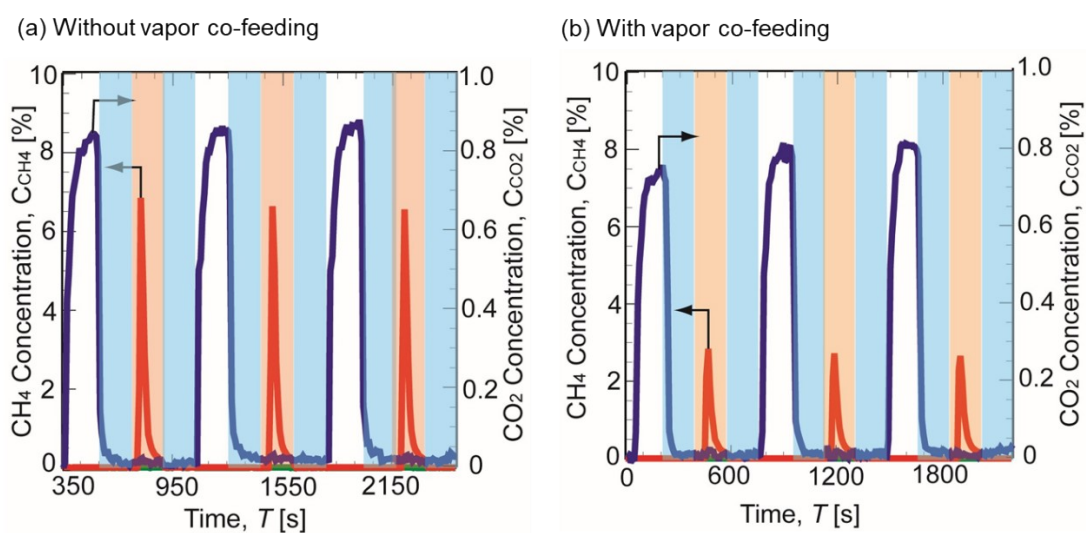

Figure S10 Concentration profile of CO<sub>2</sub> and CH<sub>4</sub> in CCR with or without vapor co-feeding.

Table S1 Results of CCR test over a series of Ni-based DFMs in the absence of O<sub>2</sub>

| DFM                                      | $Ad_{CO_2}$ <sup>[a]</sup><br>[mmol/g] | $Q_{CH_4}$ <sup>[a]</sup><br>[mmol/g] | $C_{CH_4\_Max}$ <sup>[b]</sup><br>[ppm] | $S_{CH_4}$ <sup>[c]</sup> [%] | $Conv_{adCO_2}$ <sup>[c]</sup> [%] |
|------------------------------------------|----------------------------------------|---------------------------------------|-----------------------------------------|-------------------------------|------------------------------------|
| Ni-La(15)/Al <sub>2</sub> O <sub>3</sub> | 0.158                                  | 0.120                                 | 7798                                    | 99                            | 76                                 |
| Ni-Ca(4)/Al <sub>2</sub> O <sub>3</sub>  | 0.129                                  | 0.121                                 | 4938                                    | 93                            | 94                                 |
| Ni-Na(3)/Al <sub>2</sub> O <sub>3</sub>  | 0.219                                  | 0.173                                 | 9006                                    | 94                            | 82                                 |

Reaction conditions: 0.1 g of catalyst, 350 °C, 100 mL/min of 1% CO<sub>2</sub>/N<sub>2</sub> for 5 min, followed by 100 mL/min 20% H<sub>2</sub> /N<sub>2</sub> for 5 min. b Composition of the effluent gas at the outlet was quantitatively analysed using FTIR spectroscopy combined with a gas cell. c Based on the amount of CO and CH<sub>4</sub> generated during the reduction period.

Table S2 Comparison of CH<sub>4</sub> formation amount among reported DFMs under mild reaction conditions in the co-presence of O<sub>2</sub>

| DFM                                                 | Adsorption conditions                                                                                  | Hydrogenation conditions                                | CH <sub>4</sub> formation<br>[mmol/g] | Ref.      |
|-----------------------------------------------------|--------------------------------------------------------------------------------------------------------|---------------------------------------------------------|---------------------------------------|-----------|
| Ni-La(15)/Al <sub>2</sub> O <sub>3</sub>            | 1% CO <sub>2</sub> +20% O <sub>2</sub> /N <sub>2</sub> ,<br>350 °C, 5 min                              | 20% H <sub>2</sub> /N <sub>2</sub> ,<br>350 °C, 5 min   | 0.129                                 | This work |
| 5% Ru 10%<br>CaO/γ-Al <sub>2</sub> O <sub>3</sub>   | 10% CO <sub>2</sub> /Air,<br>320 °C, 20 min                                                            | 5% H <sub>2</sub> /N <sub>2</sub> ,<br>320 °C, 20 min   | 0.50                                  | [S1]      |
| 15NiCa/Al <sub>2</sub> O <sub>3</sub>               | 10% CO <sub>2</sub> /Air,<br>360 °C, 1 min                                                             | 10% H <sub>2</sub> /Ar,<br>360 °C, 2 min                | 0.109                                 | [S2]      |
| Na <sub>2</sub> O-Ni/Al <sub>2</sub> O <sub>3</sub> | 7.5% CO <sub>2</sub> +4.5% O <sub>2</sub> +<br>15% H <sub>2</sub> O/N <sub>2</sub> ,<br>320 °C, 20 min | 15% H <sub>2</sub> /N <sub>2</sub> ,<br>320 °C, >20 min | 0                                     | [S3]      |

Reference [S1] *Appl. Catal. B*, **2015**, 168-169, 370. [S2] *J. CO<sub>2</sub> Util.*, **2019**, 34, 576. [S3] *Chem. Eng. J.*, **2019**, 375, 121953.

Table S3 Results of CCR over Ni-La(15)/Al<sub>2</sub>O<sub>3</sub> with or without vapor co-feeding

| Condition                          | $Q_{CH_4}$ <sup>[a]</sup> [mmol/g] | $C_{CH_4\_Max}$ <sup>[b]</sup> [ppm] | $S_{CH_4}$ <sup>[c]</sup> [%] |
|------------------------------------|------------------------------------|--------------------------------------|-------------------------------|
| With co-feeding (100 RH% at 25 °C) | 0.076                              | 66779                                | 99                            |
| Without co-feeding                 | 0.038                              | 27429                                | 99                            |

Reaction conditions: 2 g of catalyst, 350 °C, 1000 mL/min of 0.8% CO<sub>2</sub>+20% O<sub>2</sub>/N<sub>2</sub> or 0.8% CO<sub>2</sub>+20% O<sub>2</sub>+vapor (100 RH% at 25 °C)/N<sub>2</sub> for 3 min, followed by 100 mL/min H<sub>2</sub> for 3 min. b Composition of the effluent gas at the outlet was quantitatively analysed using FTIR spectroscopy combined with a gas cell. c Based on the amount of CO and CH<sub>4</sub> generated during the reduction period.
